# Supplementary figures and images for: Principal results of a randomised open label exploratory, safety and tolerability study with calmangafodipir in patients treated with a 12 h regimen of N-acetylcysteine for paracetamol overdose (POP trial)
Source: PubMed Central journal article supplement — eBioMedicine. 2019 Jul 13;46:423–30. doi: 10.1016/j.ebiom.2019.07.013 (PMC6710902; doi:10.1016/j.ebiom.2019.07.013), 2019-07-13

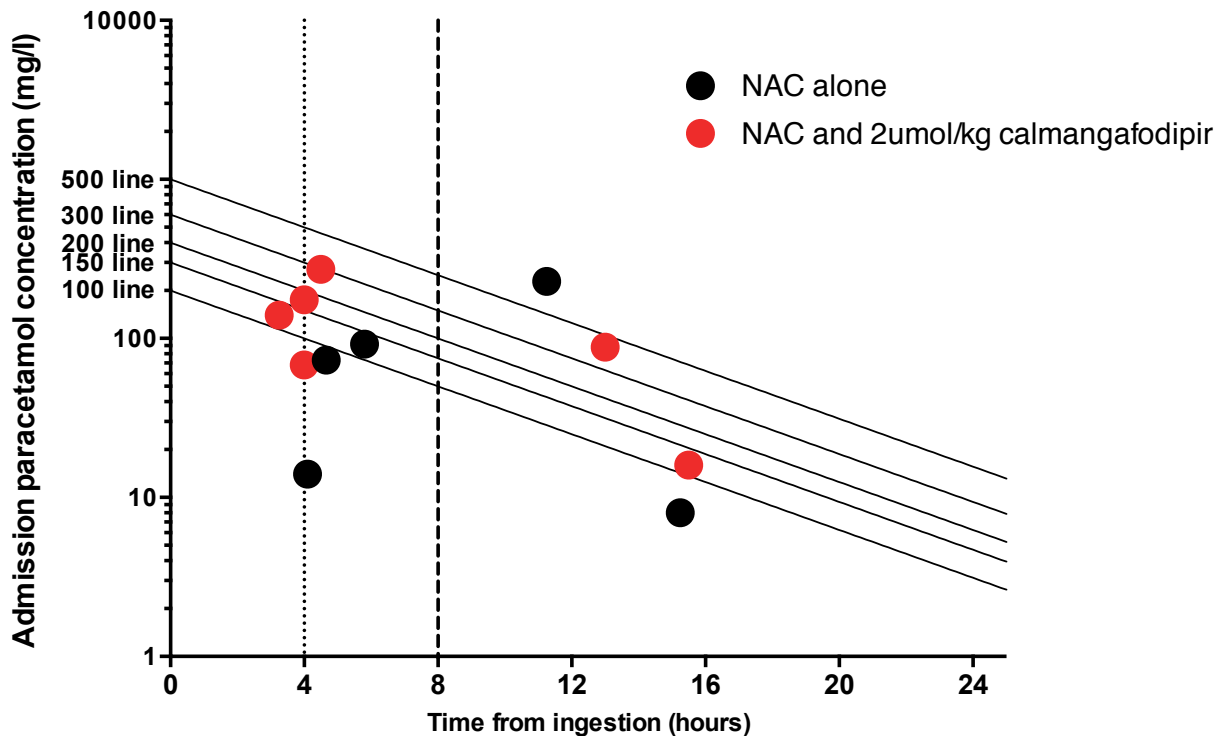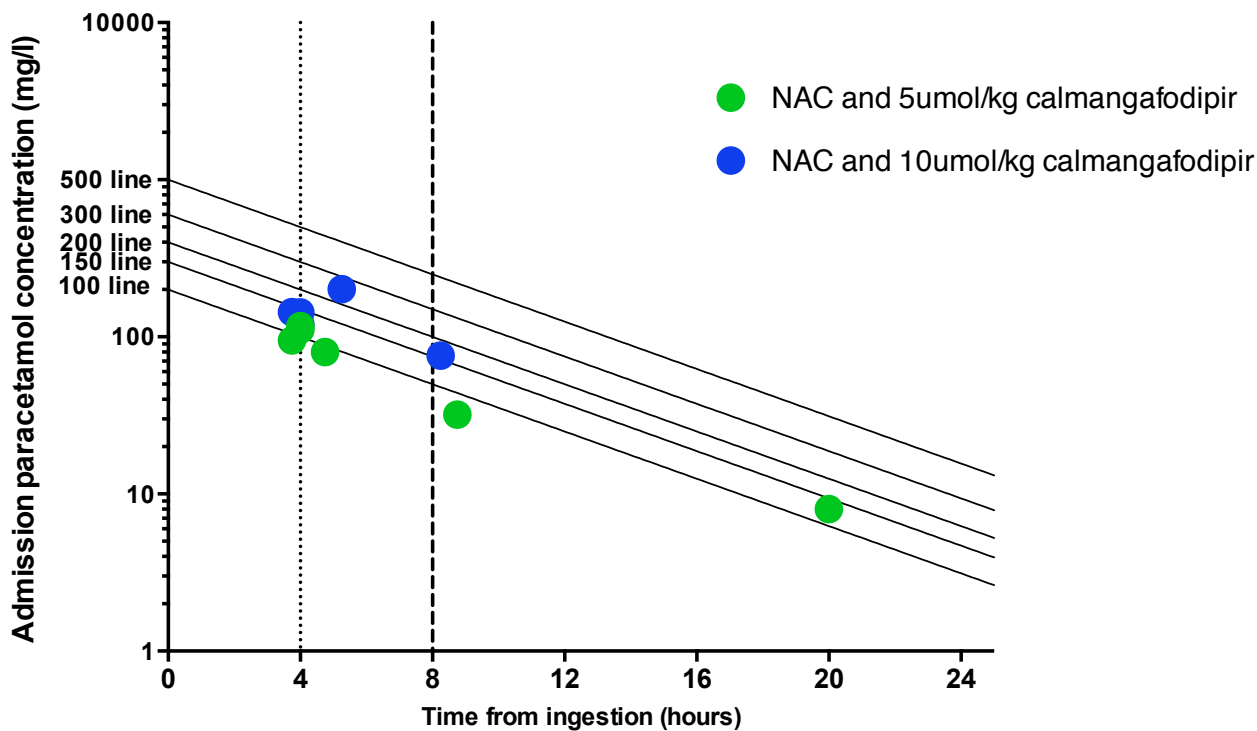

Supplementary Figure 1

Supplement: mmc5.pdf [file mmc5.pdf]

Relative change at 20 hours from baseline

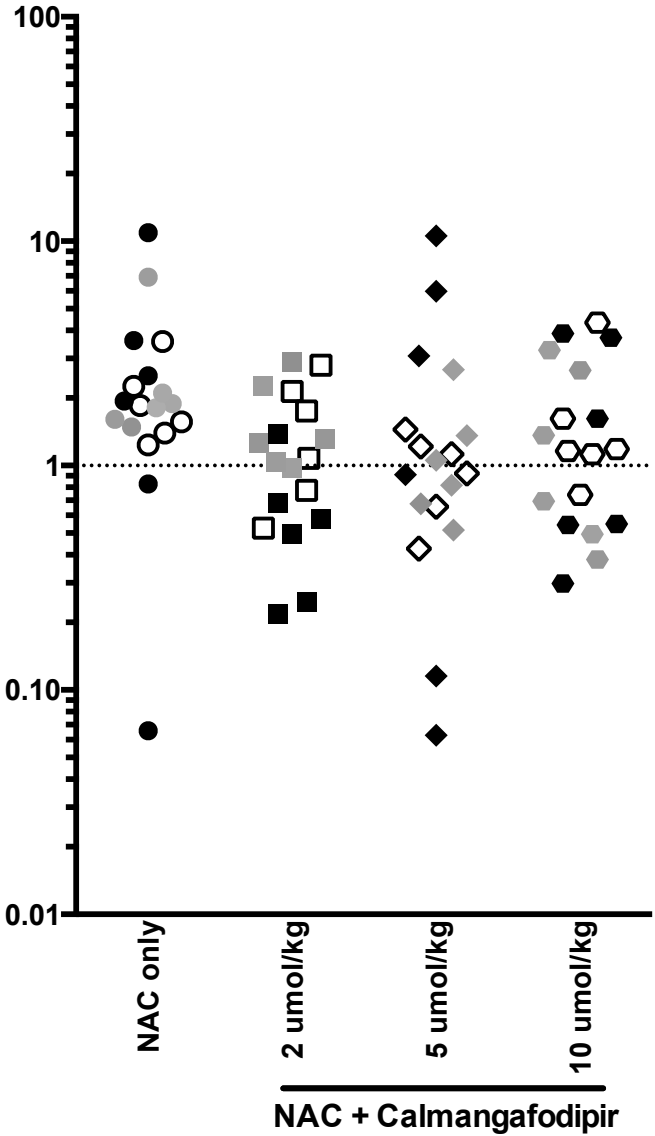

Supplement: mmc6.pdf [file mmc6.pdf]
